# Supplementary material
Source: publisher site journal article supplement (https://www.dovepress.com/article/279872)
Supplement: Supplementary file 1 [file get_supplementary_file.php]

**Table S1.** Comparisons between groups for each pupillary light reflex measure using Dunn’s multiple comparisons test.

| Comparison groups | BPD | latency | MCV | ACV | ACA | RRA | ADV | T75 |
| --- | --- | --- | --- | --- | --- | --- | --- | --- |
| Control *v* No DR | < 0.05 | > 0.05 | < 0.001 | < 0.001 | < 0.001 | < 0.001 | < 0.001 | > 0.05 |
| Control *v* Mild/Moderate NPDR | < 0.01 | < 0.01 | < 0.001 | < 0.001 | < 0.001 | < 0.05 | < 0.05 | > 0.05 |
| Control *v* Severe NPDR /PDR | < 0.001 | < 0.001 | > 0.001 | > 0.001 | < 0.001 | > 0.001 | < 0.001 | < 0.01 |
| No DR *v* Mild/Moderate NPDR | > 0.05 | > 0.05 | > 0.05 | > 0.05 | > 0.05 | > 0.05 | > 0.05 | > 0.05 |
| No DR *v* Severe NPDR /PDR | < 0.001 | < 0.01 | < 0.05 | < 0.01 | < 0.01 | > 0.05 | > 0.05 | < 0.05 |
| Mild/Moderate NPDR *v* Severe NPDR /PDR | < 0.001 | > 0.05 | < 0.001 | < 0.001 | < 0.001 | < 0.01 | < 0.01 | > 0.05 |

Abbreviations: ACA, absolute constriction amplitude; ACV, average constriction velocity; ADV, average dilation velocity; BPD, basal pupil diameter; DME, diabetic macular oedema; DR, diabetic retinopathy; MCV, maximum constriction velocity; NPDR, non-proliferative diabetic retinopathy; PDR, proliferative diabetic retinopathy; RRA, relative reflex amplitude; T75, 75% recovery time.
